# Supplementary material for: Hybrid In Vivo Breast Cancer Model Reveals Transcriptomic Insights into Cancer Progression with Age
Source: Research Square preprint supplement (doi:10.21203/rs.3.rs-7871000/v1), 2025-11-11
Supplement: Supplementary file 1 [file 40bc3eb067e4e02bdbeb9391.xlsx]

## Sheet: Sheet2
	p_val	avg_log2FC	pct.1	pct.2	p_val_adj
BRCA1-DN.V1-UP	1.63222064133496e-107	-0.248943	0.958	0.987	3.08489701212307e-105
CTIP-DN.V1-UP	1.96349911156513e-06	-0.156643	0.307	0.342	0.000371101
KRAS.LUNG.BREAST-UP.V1-UP	1.38551200943928e-236	-0.106155	1	1	2.61861769784025e-234
KRAS.BREAST-UP.V1-UP	6.07835684812163e-116	-0.101455	1	1	1.14880944429499e-113
KRAS.600.LUNG.BREAST-UP.V1-UP	1.41067194538021e-221	-0.0891344	1	1	2.6661699767686e-219
KRAS.KIDNEY-UP.V1-DN	4.52493116082607e-60	-0.0861476	1	1	8.55211989396126e-58
KRAS.AMP.LUNG-UP.V1-DN	5.50196178754686e-64	-0.0730077	1	1	1.03987077784636e-61
ATM-DN.V1-UP	5.72666044851188e-84	-0.0724016	1	1	1.08233882476875e-81
ALK-DN.V1-UP	7.35682392696315e-85	-0.0723128	1	1	1.39043972219603e-82
KRAS.600-UP.V1-UP	2.71630436872338e-154	-0.066898	1	1	5.13381525688719e-152
