# Supplementary material for: Hybrid In Vivo Breast Cancer Model Reveals Transcriptomic Insights into Cancer Progression with Age
Source: Research Square preprint supplement (doi:10.21203/rs.3.rs-7871000/v1), 2025-11-11
Supplement: Supplementary file 2 [file 7969743f7547646e6c0ad4b2.xlsx]

## Sheet: Sheet1 (2)
	p_val	avg_log2FC	pct.1	pct.2	p_val_adj
KRAS.50-UP.V1-DN	1.38253955313797e-58	0.295114	0.92	0.903	2.61299975543077e-56
JAK2-DN.V1-UP	1.89274273401172e-51	0.294304	0.853	0.818	3.57728376728215e-49
KRAS.PROSTATE-UP.V1-DN	4.42516083336735e-206	0.25361	0.999	0.999	8.3635539750643e-204
SRC-UP.V1-UP	2.6147301150026e-86	0.234453	0.981	0.974	4.94183991735491e-84
KRAS.AMP.LUNG-UP.V1-UP	4.39946161872115e-63	0.189864	0.982	0.979	8.31498245938298e-61
YAP1-DN	1.76651743364615e-44	0.112512	1	1	3.33871794959123e-42
WNT-UP.V1-UP	1.09719280666029e-193	0.107	1	1	2.07369440458795e-191
JAK2-DN.V1-DN	7.35424780832296e-68	0.0907678	1	1	1.38995283577304e-65
STK33-NOMO-DN	5.99542072101045e-163	0.0803348	1	1	1.13313451627098e-160
KRAS.300-UP.V1-DN	5.5044882041428e-58	0.0783536	1	1	1.04034827058299e-55
