# Supplementary material for: Hybrid In Vivo Breast Cancer Model Reveals Transcriptomic Insights into Cancer Progression with Age
Source: Research Square preprint supplement (doi:10.21203/rs.3.rs-7871000/v1), 2025-11-11
Supplement: Supplementary file 3 [file a6f91bc291829dfbec9c7886.xlsx]

## Sheet: Sheet1
	p_val	avg_log2FC	pct.1	pct.2	p_val_adj
HALLMARK-EPITHELIAL-MESENCHYMAL-TRANSITION	0	-0.0961116	1	1	0
HALLMARK-INFLAMMATORY-RESPONSE	6.79277416664613e-207	-0.0801604	1	1	3.39638708332307e-205
