# Supplementary material for: Hybrid In Vivo Breast Cancer Model Reveals Transcriptomic Insights into Cancer Progression with Age
Source: Research Square preprint supplement (doi:10.21203/rs.3.rs-7871000/v1), 2025-11-11
Supplement: Supplementary file 4 [file e5956bc2e5a7c1e1f95b33cf.xlsx]

## Sheet: Sheet1
	p_val	avg_log2FC	pct.1	pct.2	p_val_adj
HALLMARK-REACTIVE-OXYGEN-SPECIES-PATHWAY	2.45548557234078e-63	0.0542666	1	1	1.22774278617039e-61
HALLMARK-CHOLESTEROL-HOMEOSTASIS	8.69590120115093e-181	0.051951	1	1	4.34795060057546e-179
